# Supplementary material for: Thermoresponsive Molecular Brushes with a Rigid-Chain Aromatic Polyester Backbone and Poly-2-alkyl-2-oxazoline Side Chains
Source: MDPI journal article supplement (doi:10.3390/ijms222212265), 2021-11-12
Supplement: s1 [file s1]

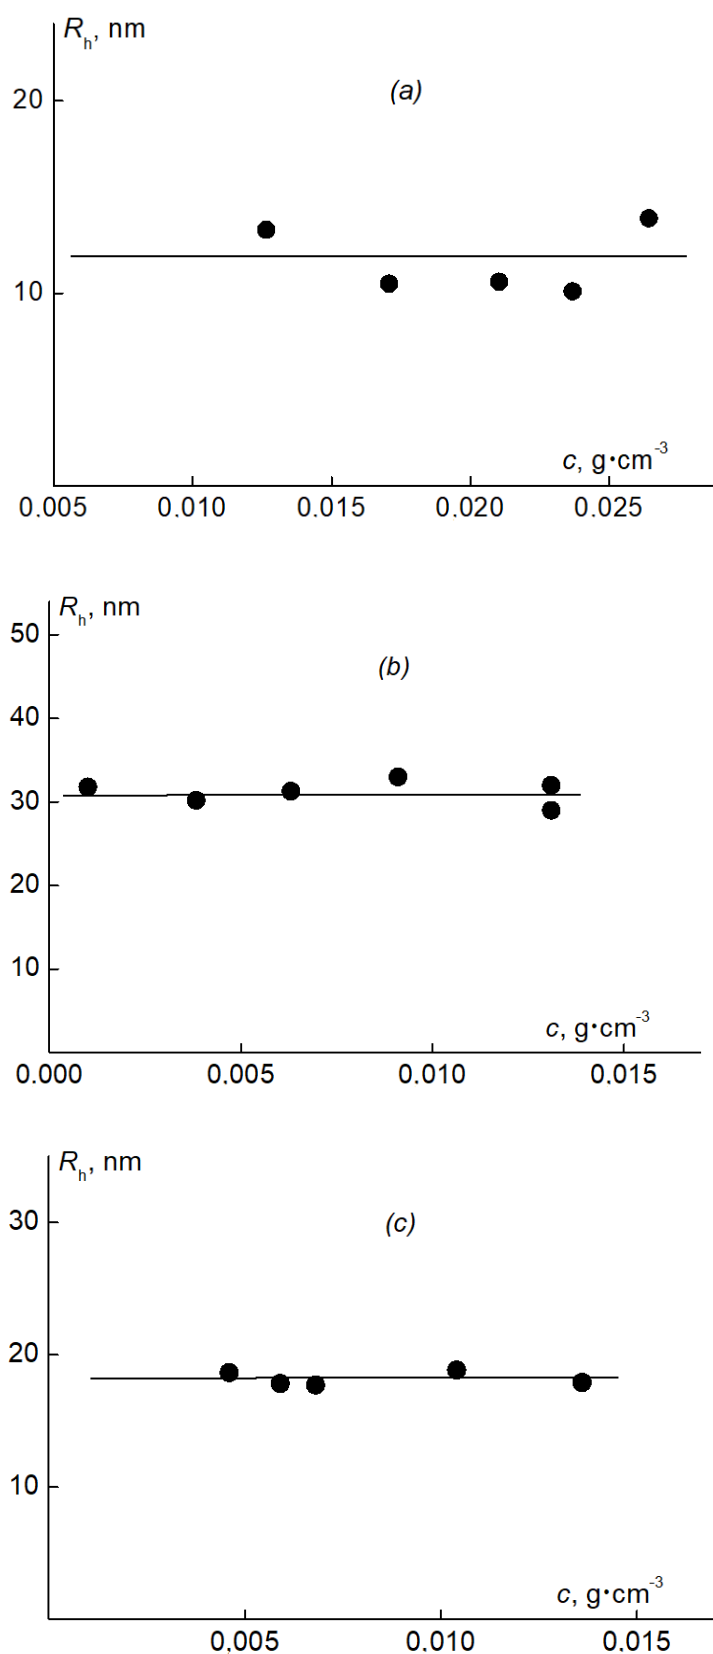

**Figure S1.** The concentration dependence of hydrodynamic radii plots for the APE<sub>r.ch.</sub> (a) in TCE, and the APE<sub>r.ch.</sub>-graft-PEtOx (b) and the APE<sub>r.ch.</sub>-graft-PiPrOx (c) in chloroform solutions.

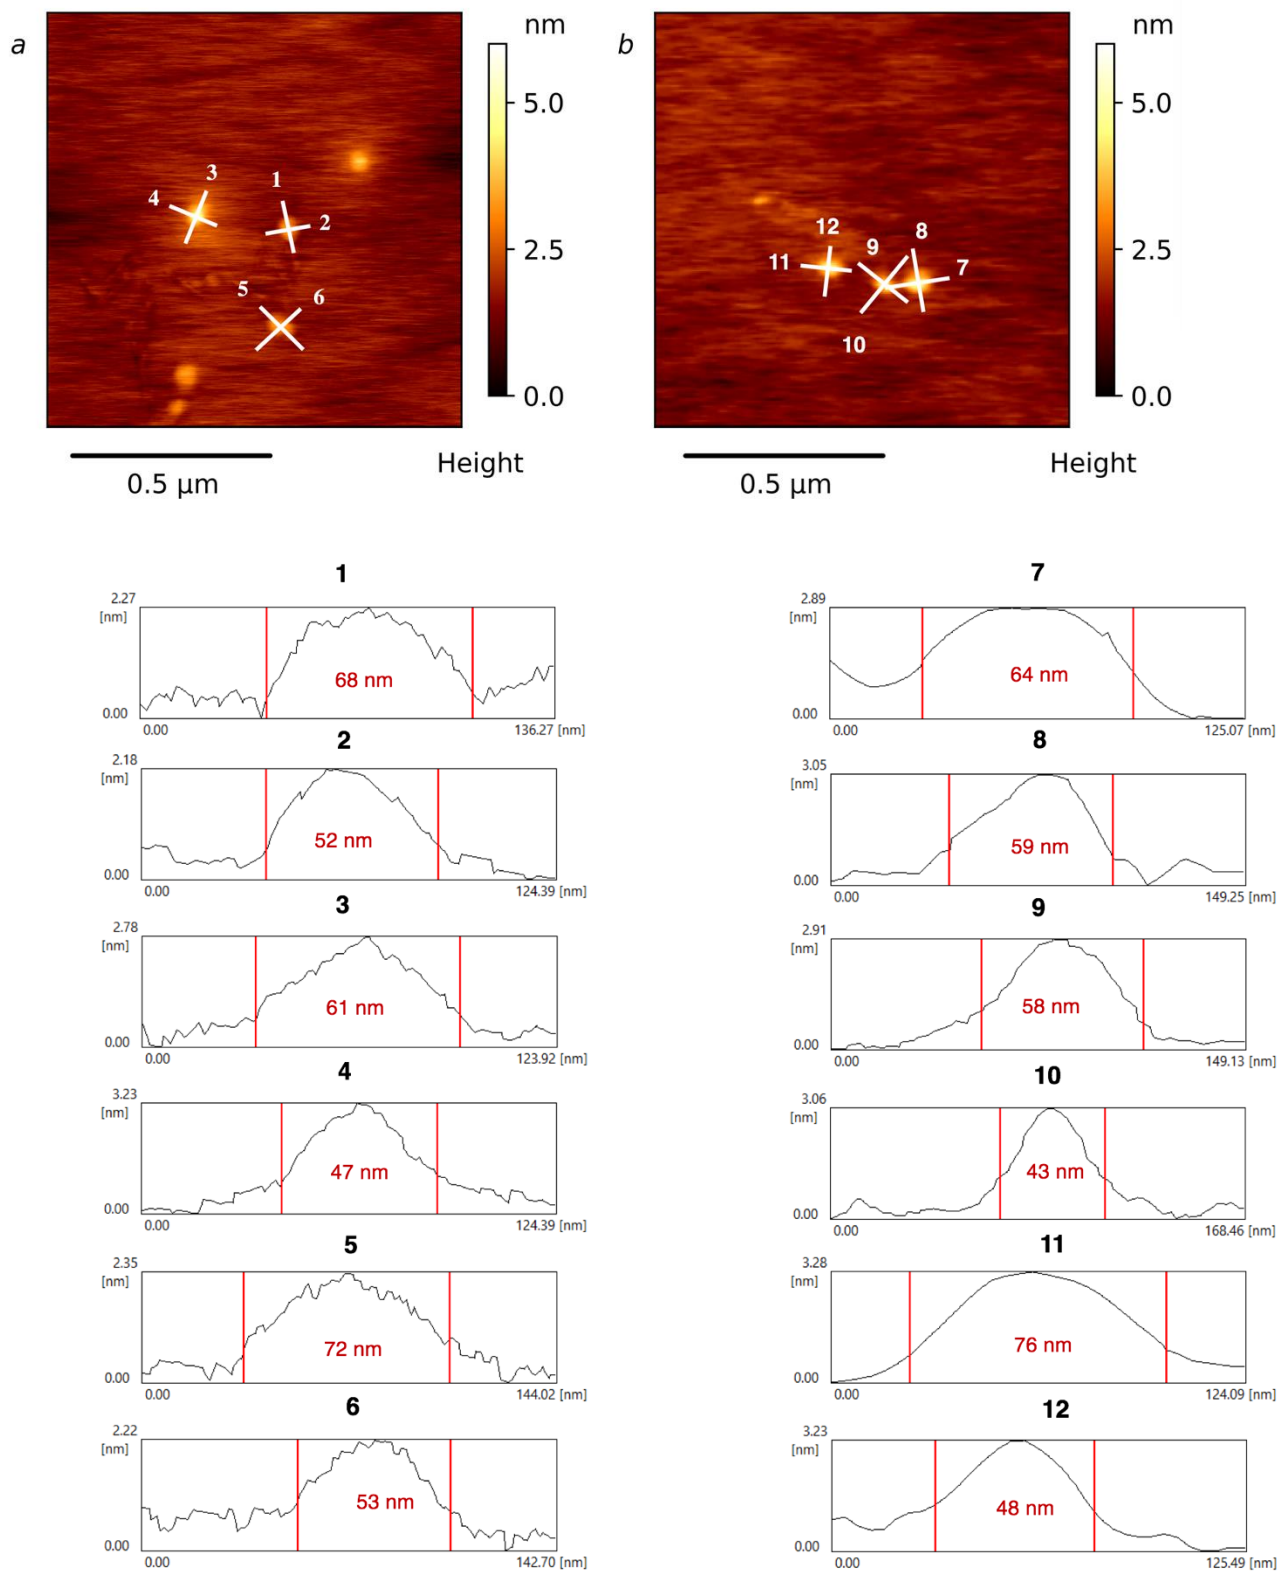

**Figure S2.** AFM topography images for different areas of mica surface with deposited APE<sub>r.ch.</sub>-graft-PiPrOx (a,b) and the AFM profiles corresponding to the white lines in a and b.

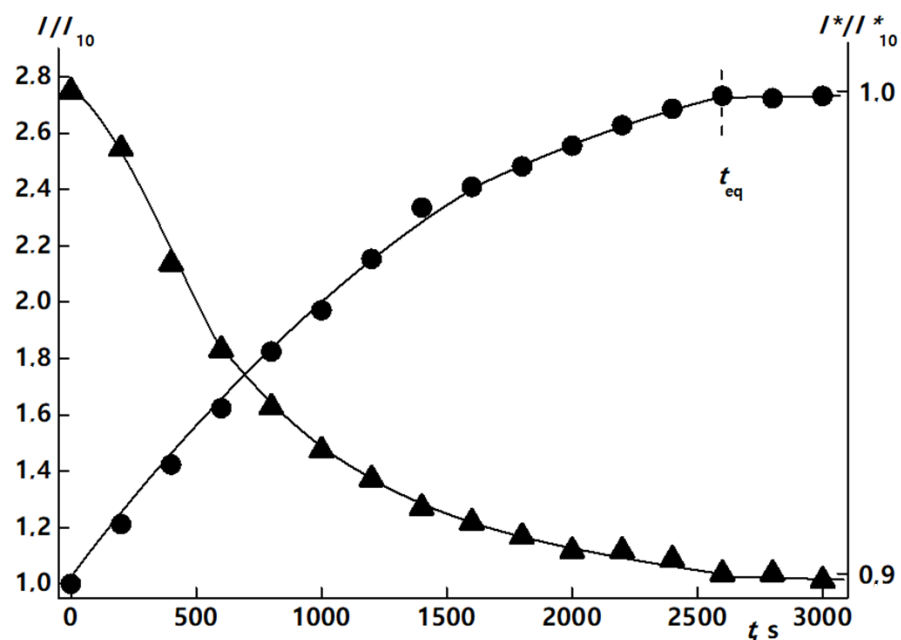

**Figure S3.** The progress of  $I/I_0$  (circles) and  $I^*/I_0^*$  (triangles) on time  $t$  for the APE<sub>r.ch.</sub>-graft-PEtOx at  $c = 0.013 \times \text{g} \cdot \text{cm}^{-3}$  and  $T = 37^\circ \text{C}$ .  $I_0$  and  $I_0^*$  are the values of the intensity of light scattering and optical transmission at  $t = 0$ , respectively. For the time  $t = 0$ , the moment was taken when the temperature reached the set value.

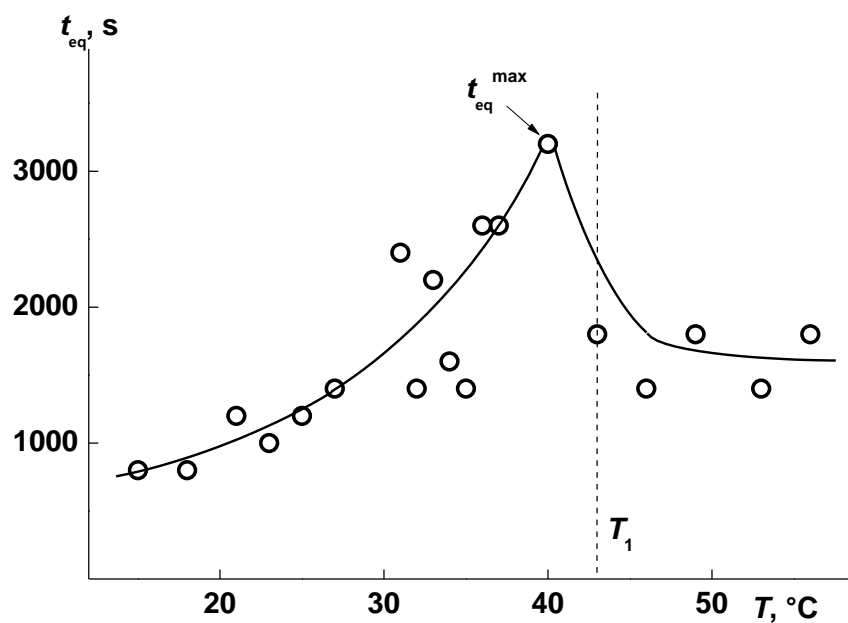

**Figure S4.** The dependence of  $t_{eq}$  on  $T$  for the APE<sub>r.ch.</sub>-graft-PEtOx solution at  $c = 0.013 \times \text{g}/\text{cm}^3$ .

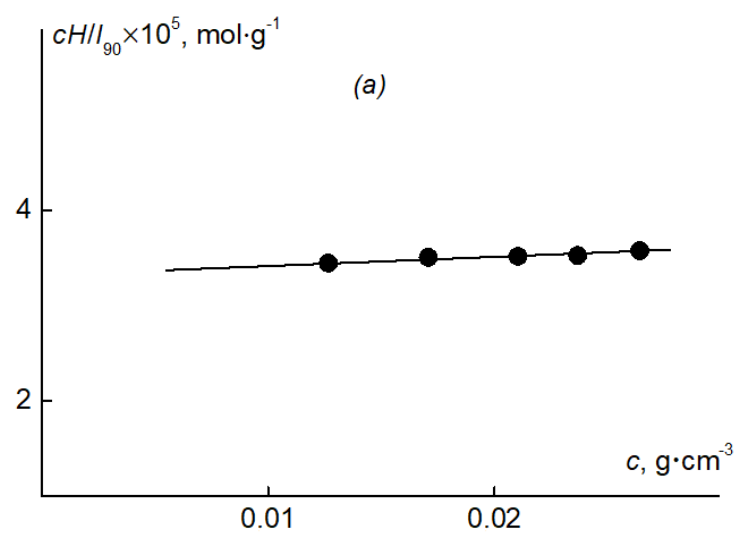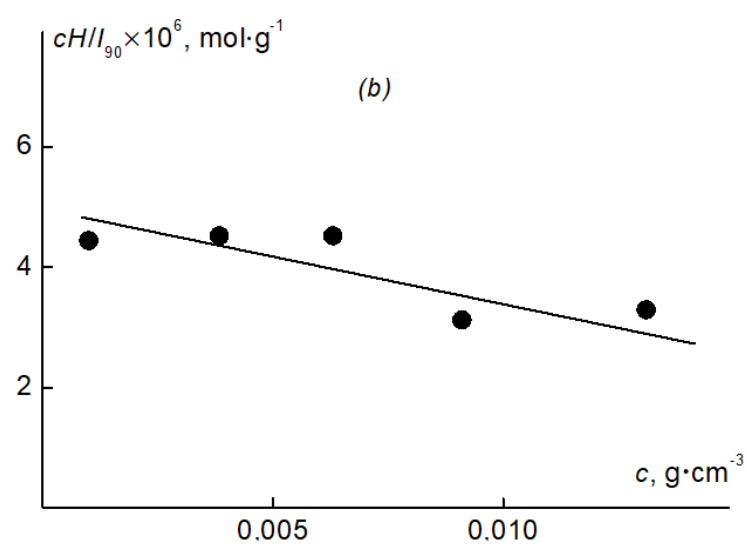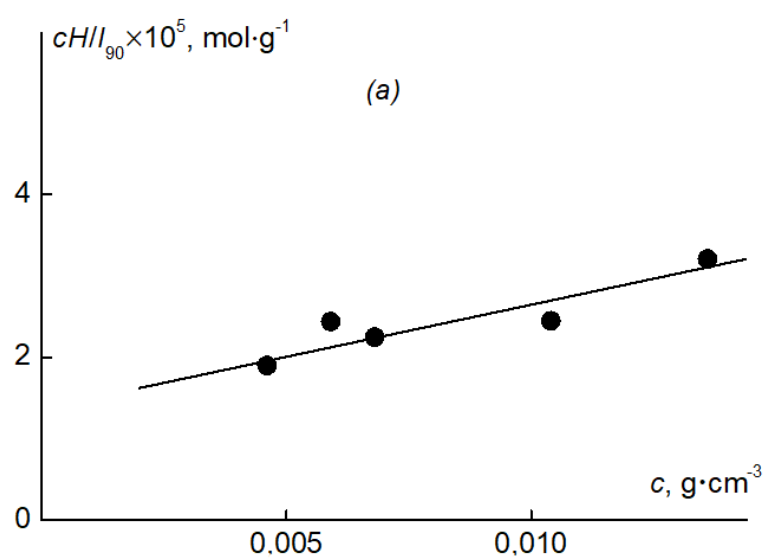

**Figure S5.** Debye plots for APE<sub>r.ch</sub>. (a), APE<sub>r.ch</sub>-graft-PETox (b), and APE<sub>r.ch</sub>-graft-PiPrOx (c).
